# Supplementary material
Source: PubMed Central journal article supplement (PMC3268330)
Supplement: 1115006109_pnas.201115006SI.pdf [file 1115006109_pnas.201115006SI.pdf]

# Supporting Information

Periasamy et al. 10.1073/pnas.1115006109

## SI Methods

**Bacterial Strains and Growth Conditions.** The clinical community-associated methicillin-resistant *S. aureus* isolates USA300 (clone LAC) (1) or USA400 (clone MW2) (2, 3) and isogenic *psm* and *agr* deletion mutants (4, 5) were used for all experiments. Of note, in  $\Delta hld$  strains, translation of *hld* is abolished by a single base mutation of the start codon, which allows for maintained function of RNAIII. Plasmids for expression of phenol-soluble modulins (PSM) peptides in the *psm* triple mutant were produced by cloning the *psm* $\alpha$ , *psm* $\beta$ , or *hld* genes into plasmid pTX15 (6) through the BamH1/Mlu1 sites. Promoter-*egfp* fusion constructs were produced by cloning the respective promoter fragments and a *Staphylococcus* codon use-optimized *egfp* gene into plasmid pRB473, which was previously described for the *psm* $\beta$  promoter of *S. epidermidis* (7). Oligonucleotides used for amplification are shown in Table S1.

Cells were grown in tryptic soy broth (TSB) supplemented with 0.5% glucose except for the xylose induction experiments, in which glucose-free TSB was used with or without 0.5% xylose. When appropriate, tetracycline (12.5  $\mu\text{g}/\text{mL}$ ) or chloramphenicol (10  $\mu\text{g}/\text{mL}$ ) was added.

1. CDC (2003) Outbreaks of community-associated methicillin-resistant *Staphylococcus aureus* skin infections—Los Angeles County, California, 2002–2003. *MMWR Morb Mortal Wkly Rep* 52:88.
2. CDC (1999) From the Centers for Disease Control and Prevention. Four pediatric deaths from community-acquired methicillin-resistant *Staphylococcus aureus*—Minnesota and North Dakota, 1997–1999. *JAMA* 282:1123–1125.
3. Baba T, et al. (2002) Genome and virulence determinants of high virulence community-acquired MRSA. *Lancet* 359:1819–1827.
4. Wang R, et al. (2007) Identification of novel cytolytic peptides as key virulence determinants for community-associated MRSA. *Nat Med* 13:1510–1514.
5. Joo HS, Cheung GY, Otto M (2011) Antimicrobial activity of community-associated methicillin-resistant *Staphylococcus aureus* is caused by phenol-soluble modulins derivatives. *J Biol Chem* 286:8933–8940.

**Biofilm Microtiter Plate Assays.** For the analysis of the impact of synthetic PSMs on biofilm formation, microtiter plate assays were performed as previously described (4). Briefly, each microtiter well was inoculated with the LAC *agr* mutant from a preculture grown overnight (1:100 volume), PSMs were added, and the plate was incubated for 24 h at 37 °C. Then, biofilms were washed gently with water and stained using safranin.

**PSM Analysis.** PSM concentrations in planktonic cultures and flow cell effluents were measured using reversed-phase HPLC/MS as previously described (4). Flow cell effluents were concentrated using precipitation with ice-cold trichloroacetic acid (1/5 volume) and redissolved in 8 M urea for analysis.

**Computer Analysis of Confocal Laser-Scanning Microscopy Images.** Total and average biovolumes were calculated using Imaris 7.2 software. Mean thickness and roughness coefficients were calculated using Comstat software (8).

**Statistics.** Statistical analysis was performed using Graph Pad Prism Version 5 with two-tailed unpaired *t* tests (two groups) unless noted otherwise.

6. Peschel A, Ottenwalder B, Gotz F (1996) Inducible production and cellular location of the epidermin biosynthetic enzyme EpiB using an improved staphylococcal expression system. *FEMS Microbiol Lett* 137:279–284.
7. Wang R, et al. (2011) *Staphylococcus epidermidis* surfactant peptides promote biofilm maturation and dissemination of biofilm-associated infection in mice. *J Clin Invest* 121: 238–248.
8. Heydorn A, et al. (2000) Quantification of biofilm structures by the novel computer program COMSTAT. *Microbiology* 146:2395–2407.

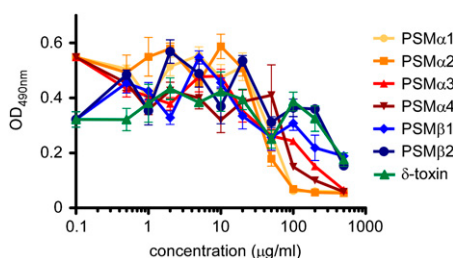

**Fig. S1.** Impact of synthetic PSMs on static biofilm formation. Synthetic (*N*-formylated) PSMs at different concentrations were added at the time of inoculation from precultures to cultures of *S. aureus* LAC  $\Delta agr$ . Biofilms were grown in TSB/0.5% glucose in 96-well microtiter plates for 24 h. Then, biofilm formation was analyzed by safranin staining and measuring  $\text{OD}_{490}$ . Values represent means  $\pm$  SEM of four replicate wells.

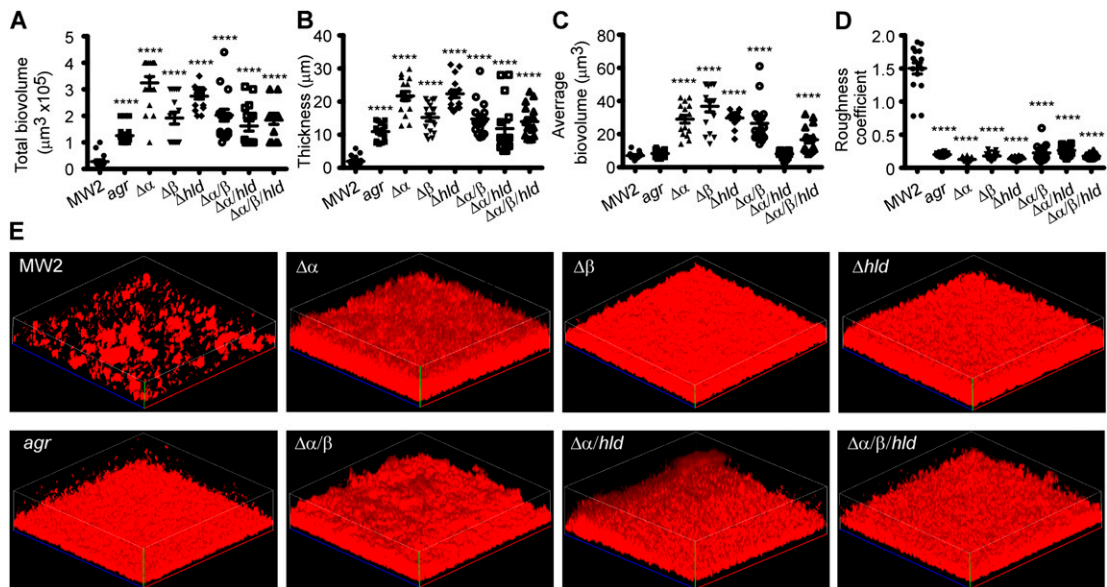

**Fig. S2.** Impact of PSMs and Agr on the structuring of static *S. aureus* MW2 biofilms. Static biofilms were grown in eight-well chambered coverglass plates for 48 h. (A–D) Biofilm parameters were measured in 16 randomly chosen biofilm confocal laser-scanning microscopy (CLSM) images of the same extension. Horizontal bars depict the mean. Statistical analysis is by *t* tests vs. the corresponding values of the WT samples, which were grown and measured separately for every mutant comparison. Only one WT analysis is shown for brevity; however, statistical analysis was performed vs. the corresponding WT samples grown in parallel, which were very similar in all cases. \*\*\*\* $P < 0.0001$ . Values for 24-h biofilms were also measured, and differences were similar. (E) Example 48-h CLSM biofilm images. Extensions and scales are the same in every image (total x extension, 230  $\mu\text{m}$ ; total y extension, 230  $\mu\text{m}$ ).

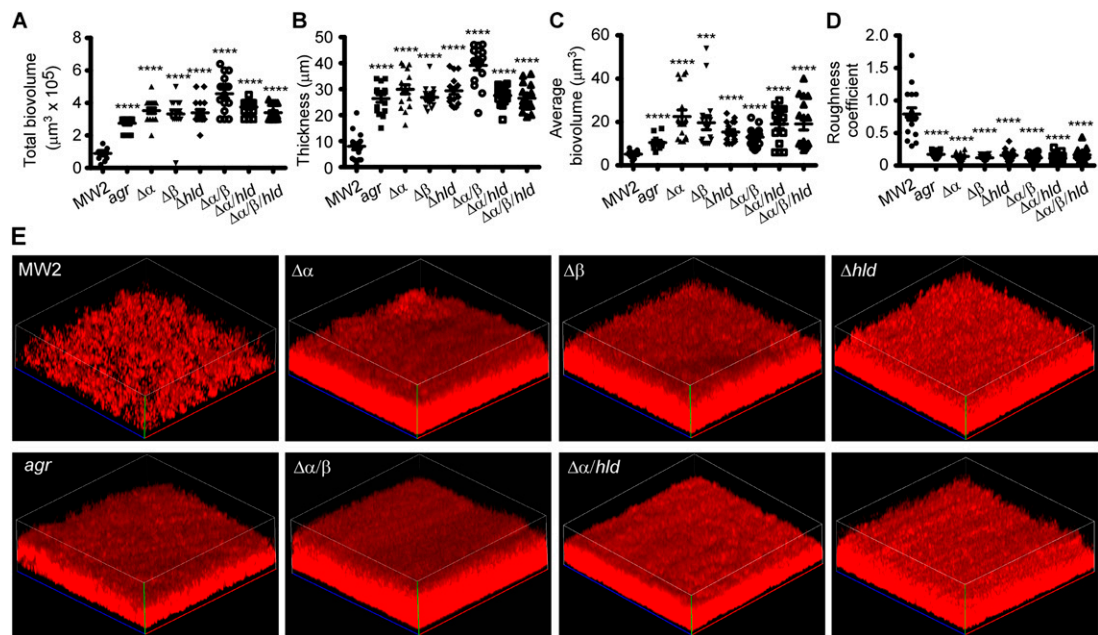

**Fig. S3.** Impact of PSMs and Agr on the structuring of dynamic (flow cell) *S. aureus* MW2 biofilms. Dynamic (flow cell) biofilms were grown for 72 h. (A–D) Biofilm parameters were measured at 72 h in 16 randomly chosen biofilm CLSM images of the same extension. Horizontal bars depict the mean. Statistical analysis is by *t* tests vs. the corresponding values of the WT samples, which were grown and measured separately for every mutant comparison. Only one WT analysis is shown for brevity; however, statistical analysis was performed vs. the corresponding WT samples grown in parallel, which were very similar in all cases. \*\*\* $P < 0.001$ ; \*\*\*\* $P < 0.0001$ . (E) Example 48-h CLSM biofilm images. Extensions and scales are the same in every image (total x extension, 230  $\mu\text{m}$ ; total y extension, 230  $\mu\text{m}$ ).
